# Supplementary material for: Rheo-SAXS study of shear-induced orientation and relaxation of cellulose nanocrystal and montmorillonite nanoplatelet dispersions
Source: Royal Society of Chemistry journal article supplement (doi:10.1039/d1sm00837d), 2021-12-13
Supplement: d1sm00837d1.pdf [file d1sm00837d1.pdf]

## Supplementary Information

### Rheo-SAXS study of shear-induced orientation and relaxation of cellulose nanocrystal and montmorillonite nanoplatelet dispersions

Pierre Munier, Seyed Ehsan Hadi, Mo Segad and Lennart Bergström

The x-ray scattering length density (SLD) of the MNT ((Na)<sub>0.33</sub>(Al)<sub>1.67</sub>(Mg)<sub>0.33</sub>(Si)<sub>4</sub>(O)<sub>10</sub>(OH)<sub>2</sub> · x H<sub>2</sub>O) is estimated to be  $24.5 \pm 0.1 \times 10^{-6}/\text{\AA}^2$  using the manufacturer's reported bulk density of  $2.86 \text{ g}\cdot\text{cm}^{-3}$ . We have used previously reported x-ray SLDs of crystalline cellulose and bulk water of  $14.46 \times 10^{-6}/\text{\AA}^2$  and  $9.47 \times 10^{-6}/\text{\AA}^2$ , respectively.<sup>1</sup> The pH values for MNT-only, CNC 3.6 wt% and MNT 2.5 wt% composite, and CNC-only dispersions are approximately 9, 6, and 5, respectively.

#### Effective diameter estimation:

After estimation of the ionic strength (Equation S1) of the CNC-only 3.6 wt% dispersion, the Debye length has been calculated using Equation S2:

$$I = \frac{1}{2} \sum_{i=1}^n c_i Z_i^2 \quad (\text{S1})$$

$$\kappa^{-1} = \sqrt{\frac{\epsilon_r \epsilon_0 k_B T}{2 N_A e^2 I}} \quad (\text{S2})$$

Effective diameter of CNC particles can be calculated using Equation S3:

$$D_{eff} = D + \kappa^{-1} (\ln A + C + \ln 2 - \frac{1}{2}) \quad (\text{S3})$$

where  $C$  is the Euler constant,  $\kappa^{-1}$  is the Debye length,  $D$  is diameter of the particle and  $A$  can be calculated by using Equation S4:

$$A = 2\pi v_{eff}^2 \kappa^{-1} Q \exp(-\kappa D) \quad (\text{S4})$$

Where  $v_{eff}$  denotes the effective linear charge density and  $Q$  is the Bjerrum length (0.714 nm). Given that, by considering  $D$  and  $L$  4.3 nm and 173 nm, respectively, the Debye length  $\kappa^{-1} = 5.25$  nm and charge density of 0.314 mmol/g (measured by titrimetrically) and a pKa of 2.5 for sulfate half-ester groups which yields degree of disassociation to be around 0.4, and assuming all charges are on the surface of CNC, and density of the CNC to be  $1.6 \text{ g}\cdot\text{cm}^{-3}$ , the surface charge density of the CNC is estimated to be around  $0.13 \text{ e}/\text{nm}^2$ . The effective linear charge density has been calculated using Equation S5:

$$v_{eff} = \frac{2\pi\sigma_s}{(\kappa K_1(\kappa \frac{D}{2}))} \quad (\text{S5})$$

Where the  $\sigma_s$  is the surface charge density, and  $K_1$  is the first order modified Bessel function of the second kind, and  $\kappa^{-1}$  is the Debye length.

Using Equation S5 yielded the effective linear charge density to be around  $2 \text{ e}/\text{nm}$ . Given that, by using Equation S3 the effective diameter is estimated to be around  $28 \text{ nm}$ .<sup>2,3</sup>

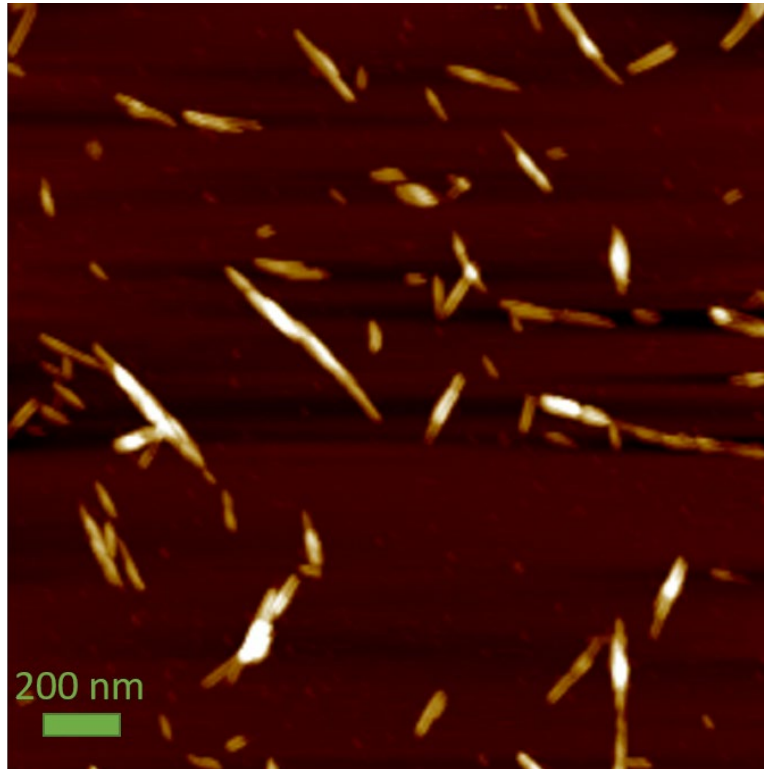

**Figure S1.** AFM micrograph showing the CNC used in this study, and from which the average particle dimensions were estimated.

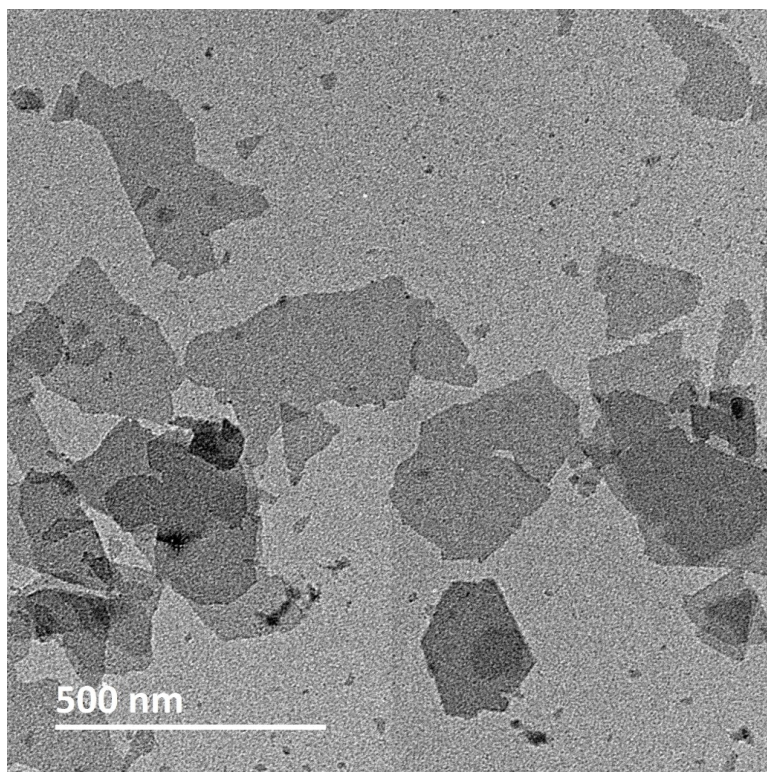

**Figure S2.** TEM micrograph showing the MNT used in this study, and from which the average platelet diameter was estimated.

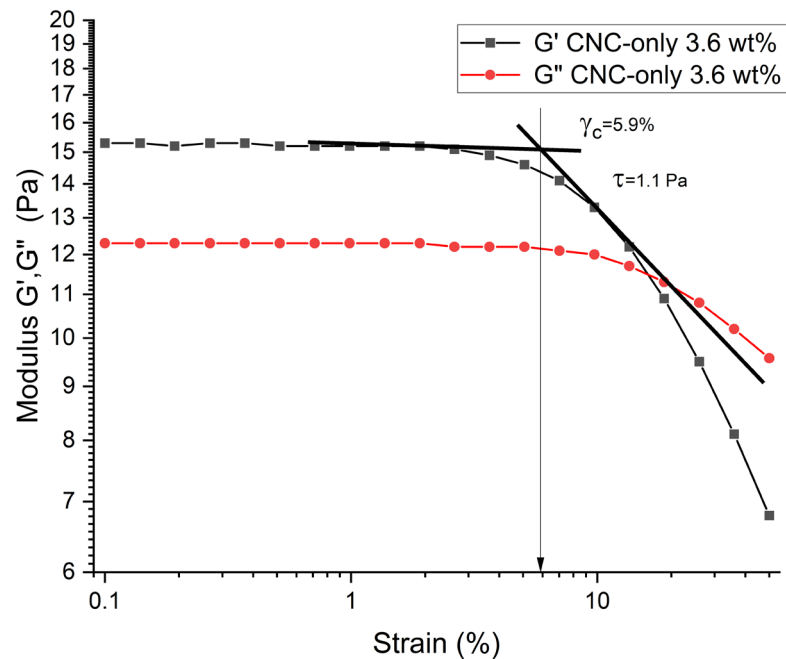

**Figure S3.** Strain sweep of CNC-only 3.6 wt% dispersion. The measurement has been performed at 25 °C with a constant angular frequency of 1 rad.s<sup>-1</sup>.

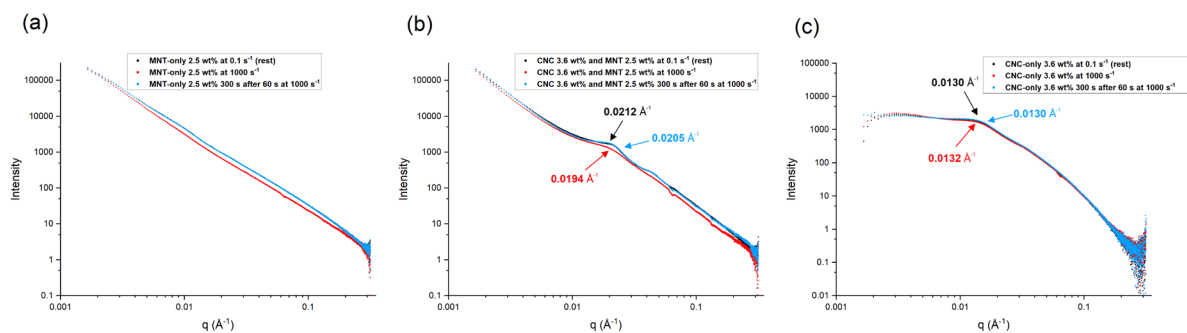

**Figure S4.** Radial integration of SAXS patterns of (a) MNT-only 2.5 wt%, (b) CNC 3.6 wt% and MNT 2.5 wt% composite, and (c) CNC-only 3.6 wt% dispersions obtained at the shear rate of 0.1 s<sup>-1</sup> (rest), at second 59 of a 60-second shearing at the shear rate of 1000 s<sup>-1</sup>, and at 300 seconds after a 60-second shearing at the shear rate of 1000 s<sup>-1</sup> (relaxation). The positions of the peaks are indicated in the corresponding legend.

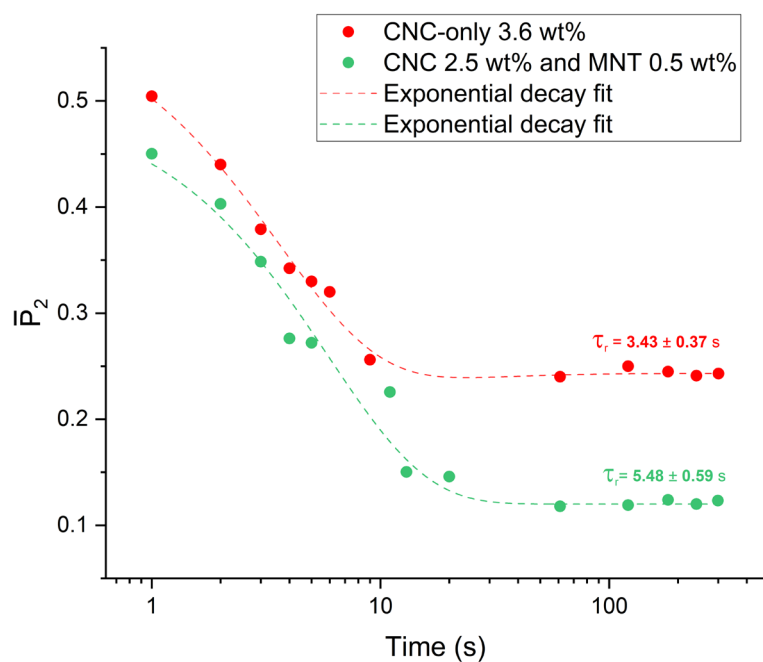

**Figure S5.** Hermans' orientation parameter as a function of time for a CNC-only 3.6 wt% and a CNC:MNT composite dispersion containing 2.5 wt% CNC and 0.5 wt% MNT. The dashed curves represent least-square fit to exponential decay functions with a single time constant ( $y = (A_1 - y_0)\exp(-x/t_1) + y_0$ ), of which the value is indicated in the corresponding legend. The  $R^2$  values for CNC-only 3.6 wt% and CNC 2.5 wt% and MNT 0.5 wt% composite fittings are 0.99 and 0.97, respectively.

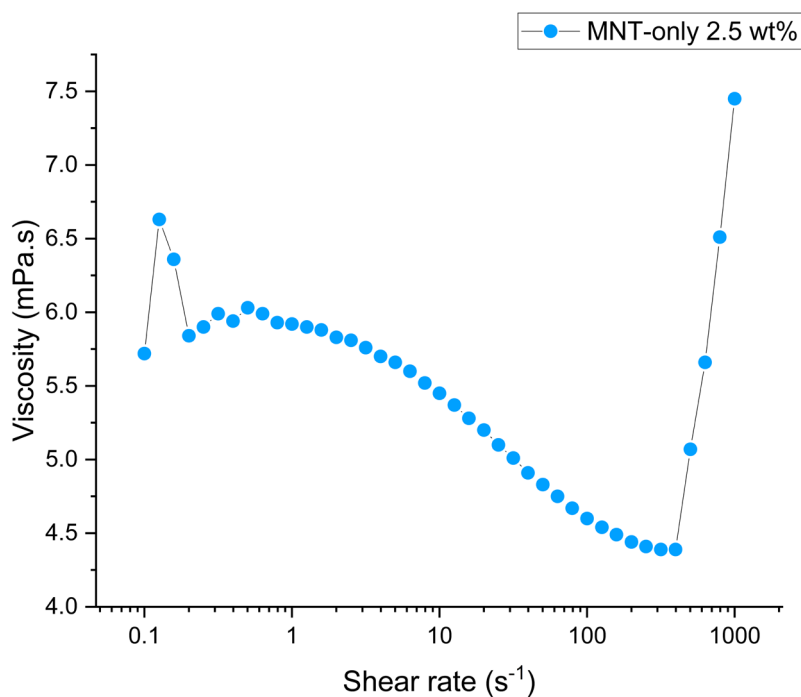

**Figure S6.** Steady-state shear viscosity against shear rate obtained via rotational measurements on MNT-only 2.5 wt% dispersion at 25 °C.

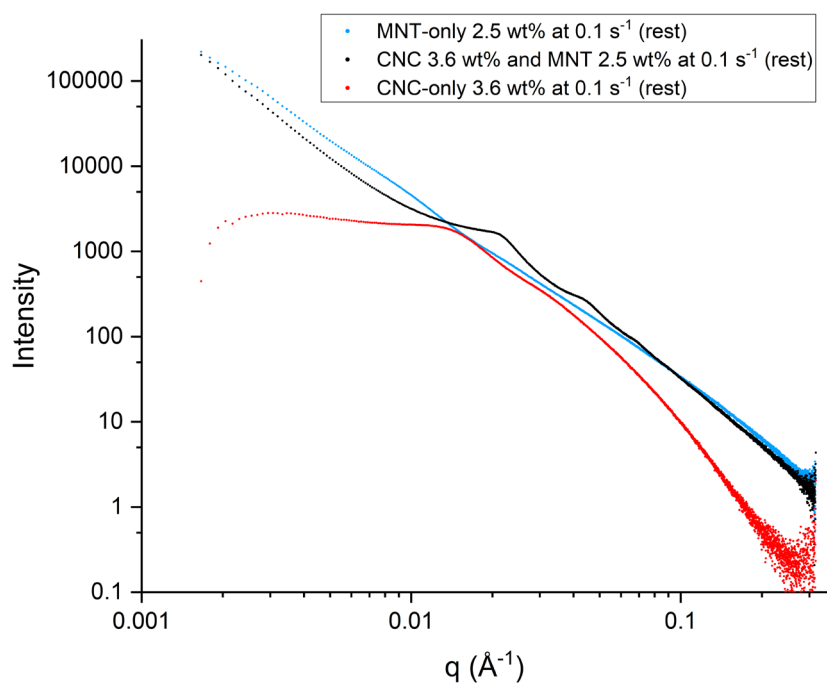

**Figure S7.** Radial integration of SAXS patterns of CNC-only, CNC:MNT composite, and MNT-only dispersions at the shear rate of  $0.1 \text{ s}^{-1}$  (rest).

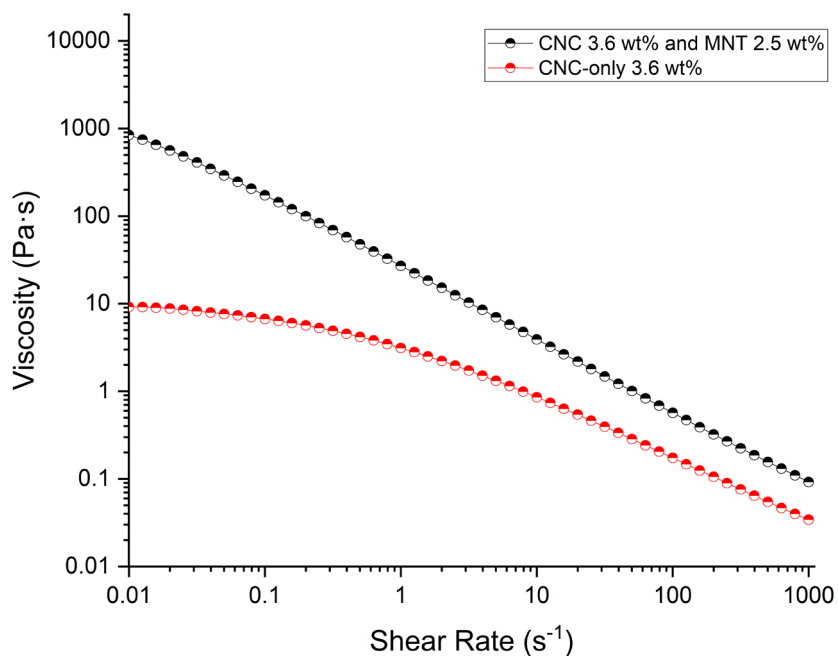

**Figure S8.** Steady-state shear viscosity against shear rate obtained via rotational measurements on CNC-only and CNC:MNT dispersions at  $25 \text{ }^\circ\text{C}$ . All samples are subjected to vigorous vortexing and are immediately measured.

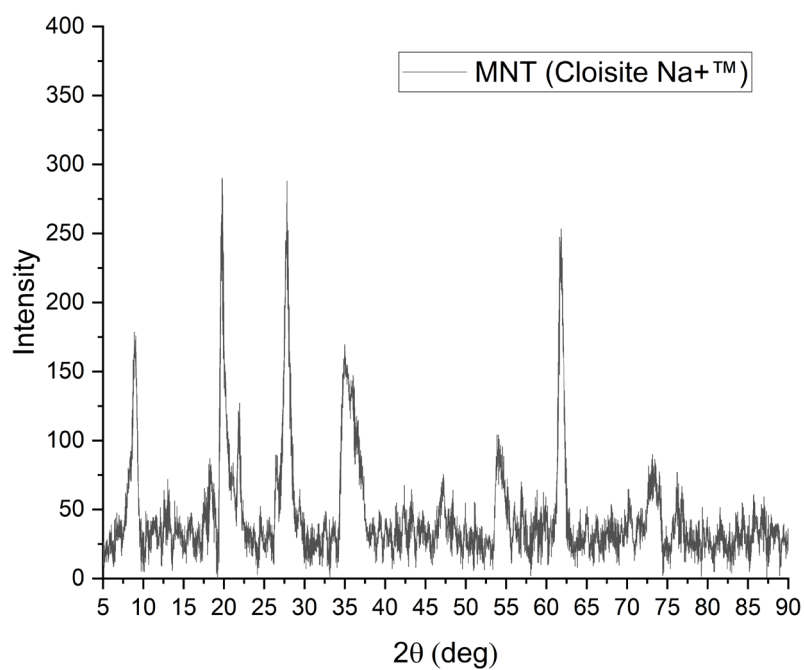

**Figure S9.** X-ray diffraction pattern of MNT (Cloisite Na+™). The sample was dried at 102 °C for 5 hours prior to the measurement.

### References

1. M. Martínez-Sanz, M. J. Gidley and E. P. Gilbert, *Soft Matter*, 2016, **12**, 1534–1549.
2. X. M. Dong, T. Kimura, J.-F. Revol and D. G. Gray, *Langmuir*, 1996, **12**, 2076–2082.
3. T. Abitbol, H. Marway and E. D. Cranston, *Nordic Pulp & Paper Research Journal*, 2014, **29**, 46–57.
